# Supplementary material for: Temperature Controls Crystalline Iron Oxide Utilization by Microbial Communities in Methanic Ferruginous Marine Sediment Incubations
Source: PubMed Central journal article supplement (PMC6218420; doi:10.3389/fmicb.2018.02574), 2018-10-30
Supplement: Data_Sheet_1.pdf [file Data_Sheet_1.pdf]

## Supplementary Information

### Temperature Controls Crystalline Iron Oxide Utilization by Microbial Communities in Methanic Ferruginous Marine Sediment Incubations

David A. Aromokeye<sup>1,2,3</sup>, Tim Richter-Heitmann<sup>1</sup>, Oluwatobi E. Oni<sup>1,2</sup>, Ajinkya Kulkarni<sup>1,2,3</sup>, Xiuran Yin<sup>1,2,3</sup>, Sabine Kasten<sup>2,4,5</sup> and Michael W. Friedrich<sup>1,2,\*</sup>.

<sup>1</sup>Microbial Ecophysiology Group, Faculty of Biology/Chemistry, University of Bremen, Bremen, Germany

<sup>2</sup>MARUM, Center for Marine Environmental Sciences, University of Bremen, Bremen, Germany

<sup>3</sup>International Max-Planck Research School for Marine Microbiology, Max-Planck-Institute for Marine Microbiology, Bremen, Germany

<sup>4</sup>Alfred Wegener Institute Helmholtz Centre for Polar and Marine Research, Bremerhaven, Germany

<sup>5</sup>University of Bremen, Faculty of Geosciences, Bremen, Germany

\*Correspondence:

Michael W. Friedrich,

<sup>1</sup>Microbial Ecophysiology Group, Faculty of Biology/Chemistry & MARUM, University of Bremen, PO Box 33 04 40, D-28334 Bremen, Germany

Email: [michael.friedrich@uni-bremen.de](mailto:michael.friedrich@uni-bremen.de)

## Supplementary Figures

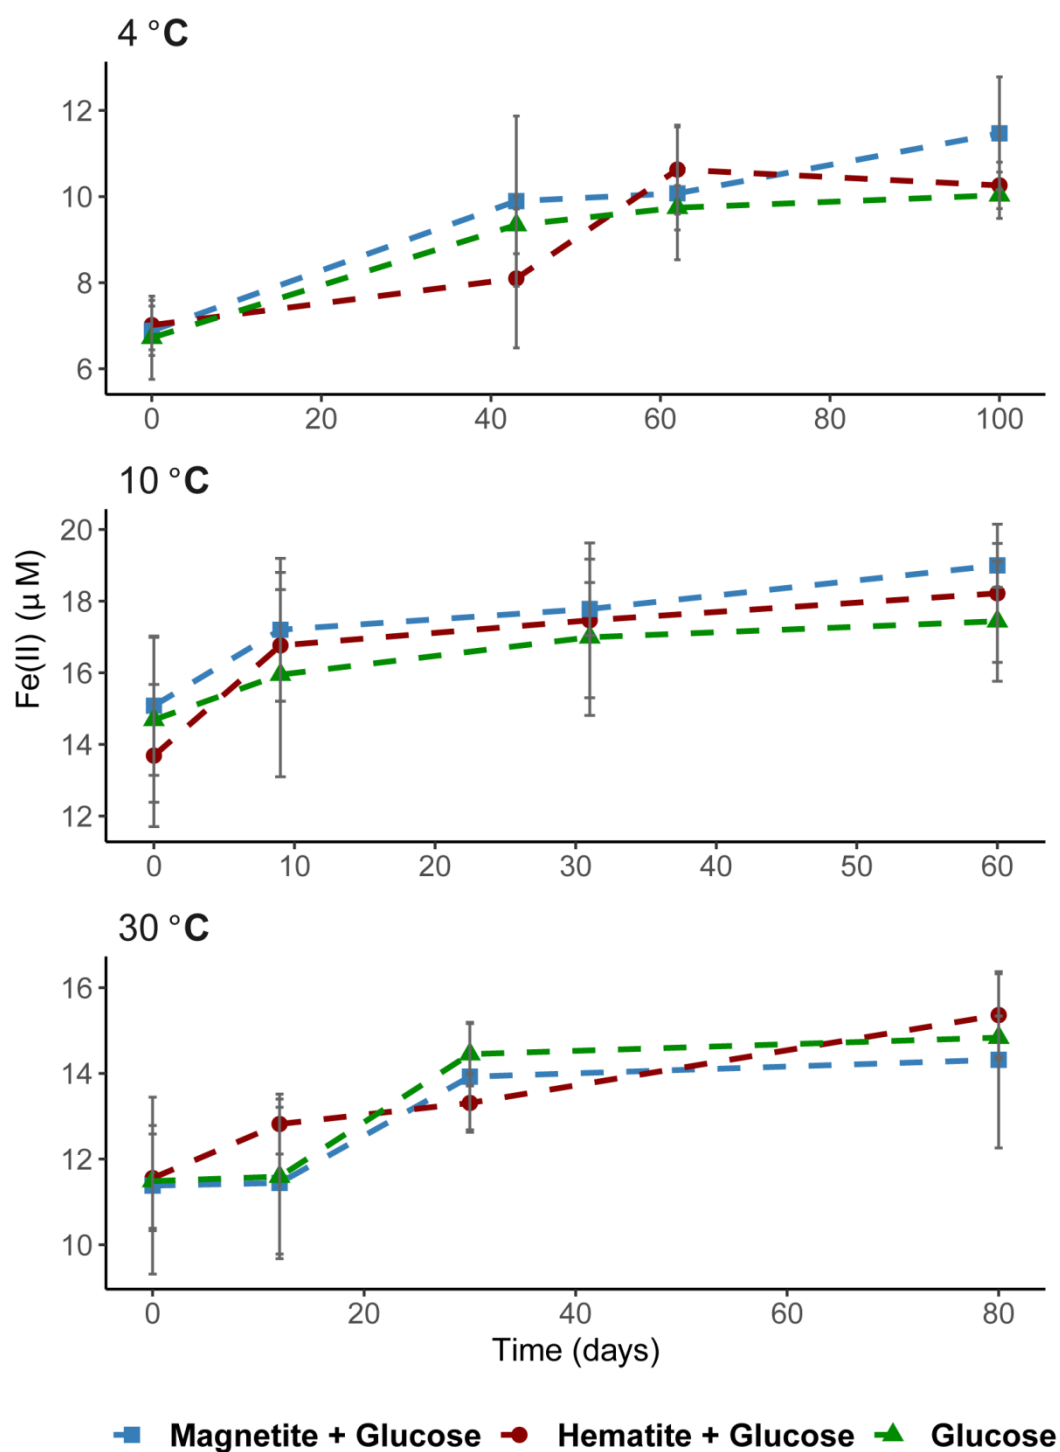

**Figure S1:** HCl extractable Fe(II) measured across selected time-points during the iron reduction experiments. The total Fe(II) measurements were done on whole slurry material (see methods) unlike the  $\text{Fe}^{2+}$  measurements from pore water (Fig. 1, main text).

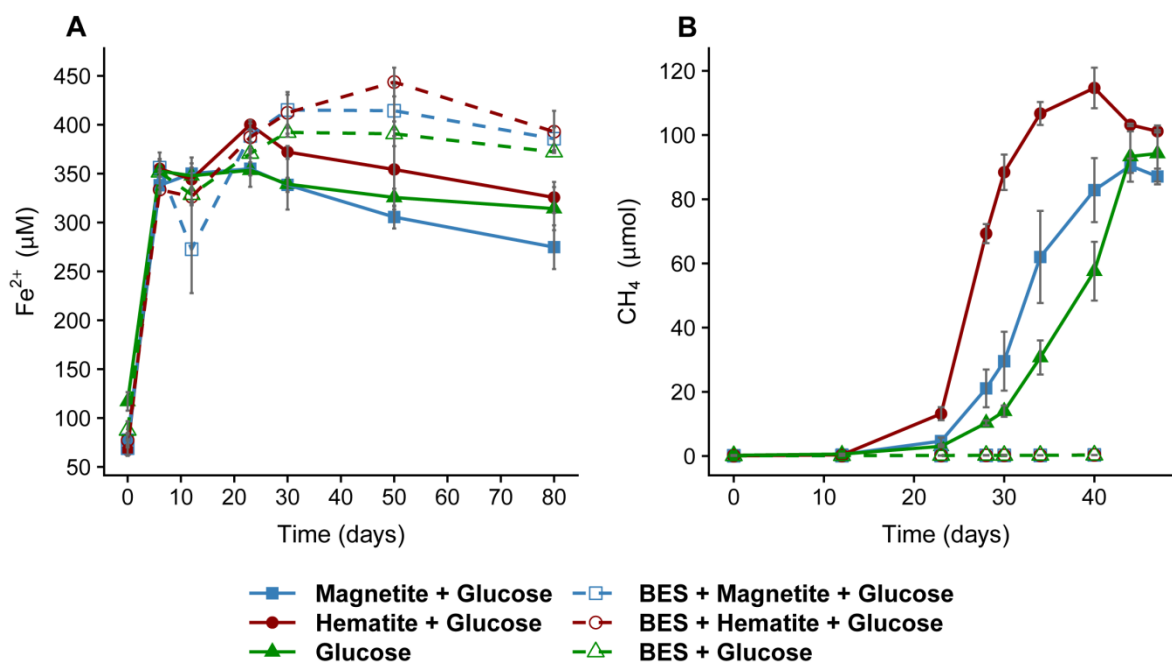

**Figure S2:** Effect of BES on iron reduction (A) and methanogenesis (B) in the presence of the crystalline iron minerals. Incubations were performed at 30 °C. Data presented for the non BES amended controls are presented in Figure 1 of the main text but are re-plotted here as controls for evaluating the effect of BES on iron reduction in comparison to the controls.

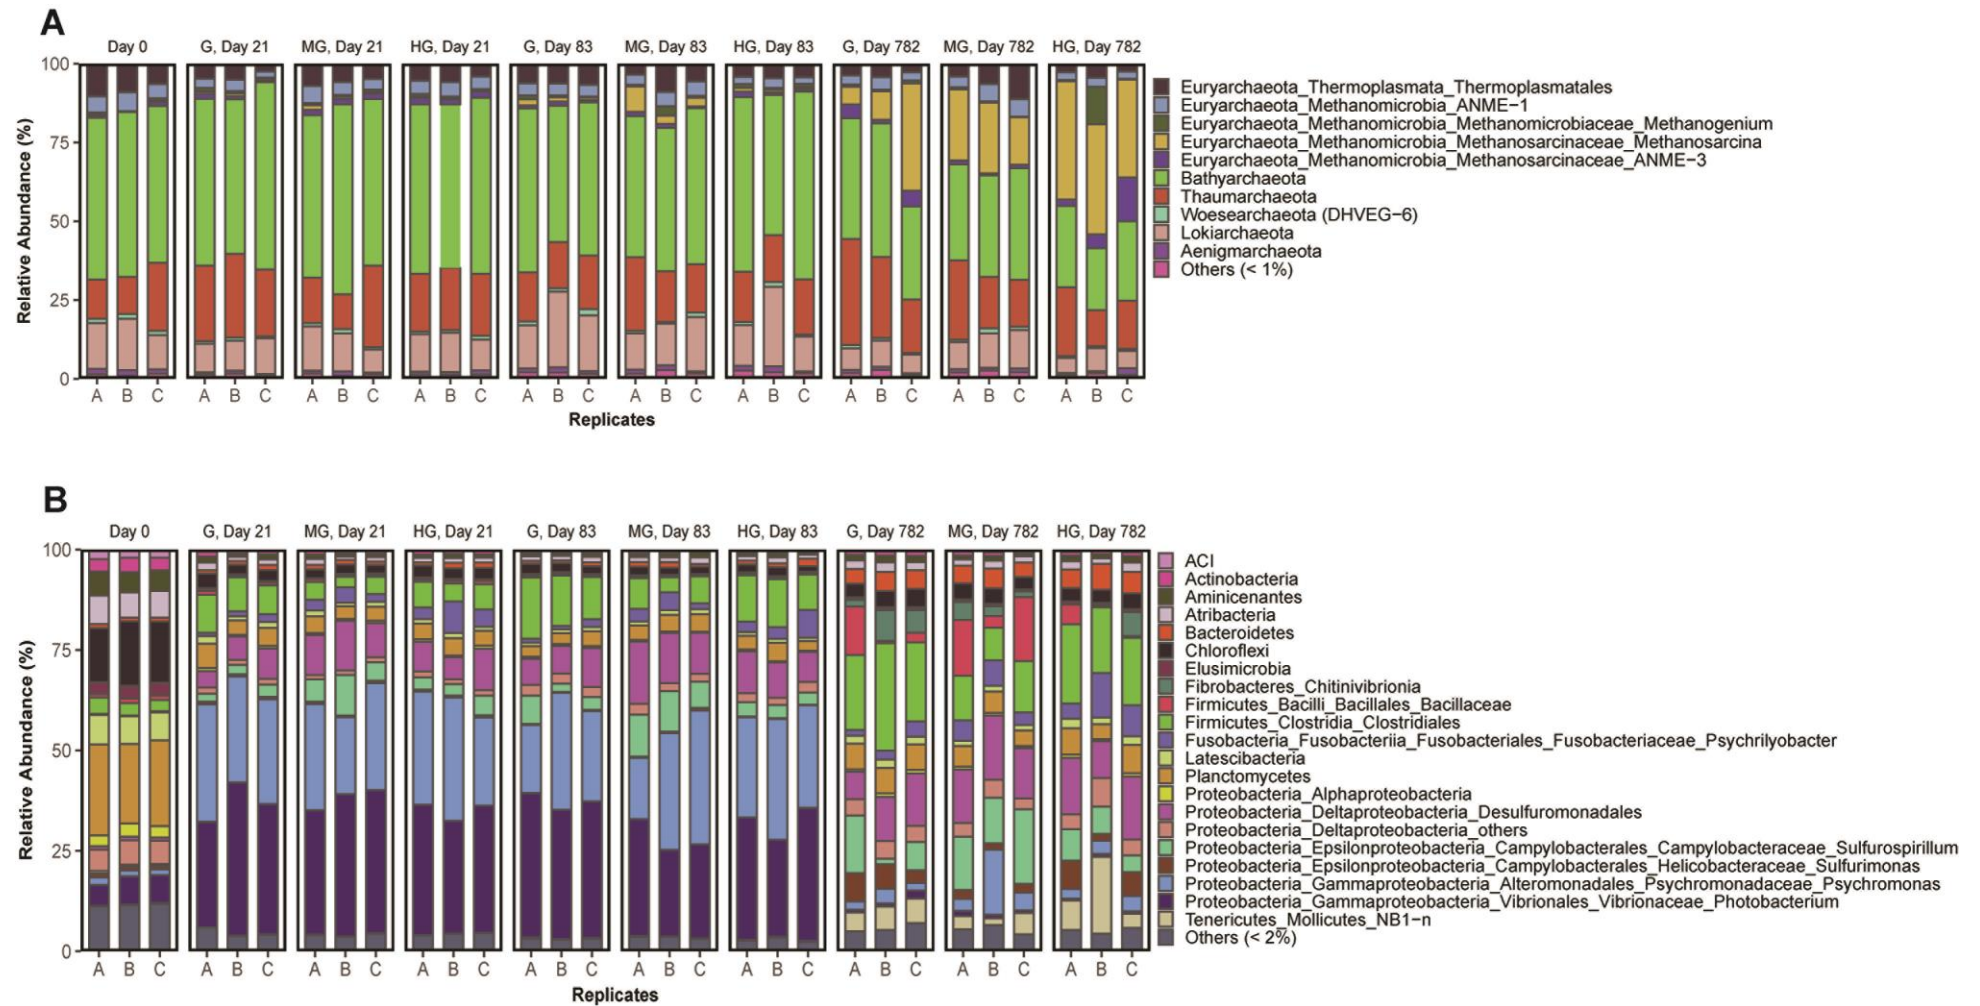

**Figure S3:** Total sum scaling of archaea (A) and bacteria (B) communities in incubations at 4 °C between day 0, day 21 (intermediate iron reduction phase), day 83 (peak of iron reduction phase based on  $\text{Fe}^{2+}$  concentrations) and day 782 (methanogenesis phase). G, glucose amended incubation; MG, incubations amended with magnetite and glucose; HG, hematite and glucose amendments. Each triplicate sample was sequenced individually (see methods). Microbial communities were scaled in a mixed style such that the phyla with decreased relative abundance over time compared to day 0 were reported on the phylum level. Lower taxonomic classification was reported for orders, families and genera from other phyla with increased relative abundance compared to day 0.

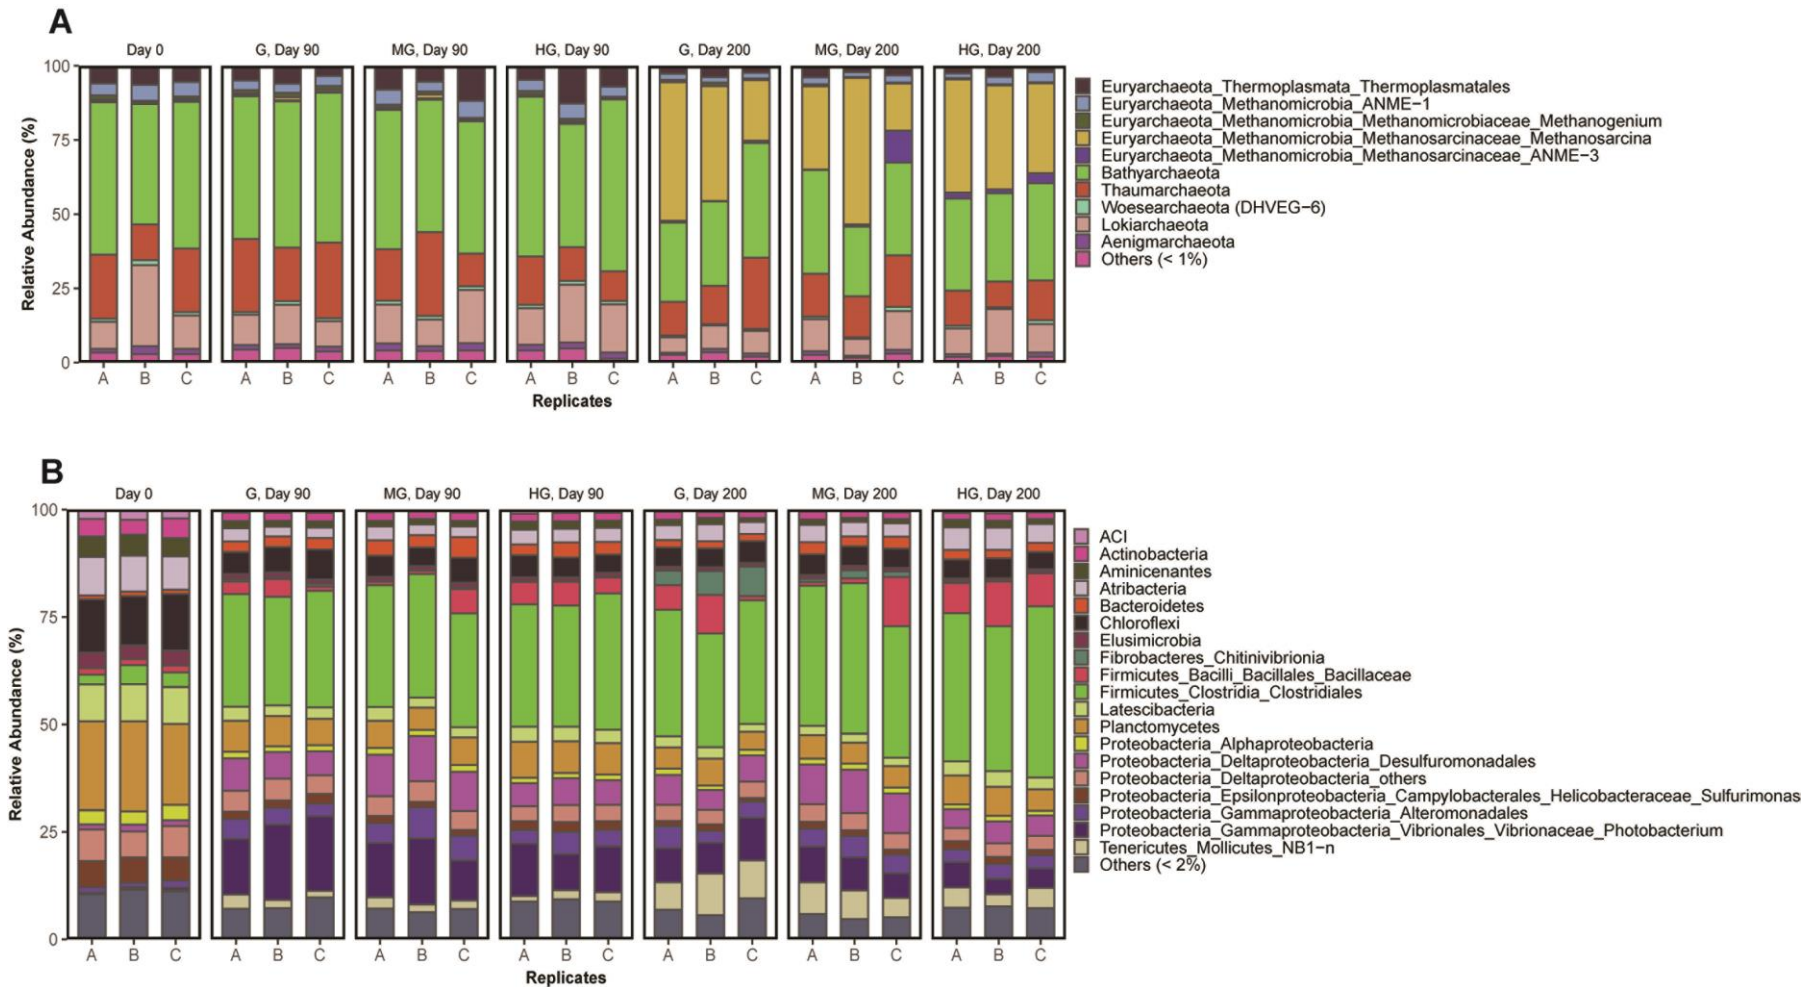

**Figure S4:** Total sum scaling of archaea (A) and bacteria (B) communities in the incubations at 10 °C between day 0, day 90 (when aqueous  $\text{Fe}^{2+}$  concentrations reached a plateau) and day 200 (during active methanogenesis). G represents glucose amended incubation; MG represents incubations amended with magnetite and glucose while HG represents hematite and glucose amendments. Each triplicate sample was sequenced individually (see methods). Microbial communities were scaled in a mixed style such that the Phyla with decreased relative abundance over time compared to day 0 were reported on the phylum level. Whereas, lower taxonomic classification was reported for orders, families and genera from other phyla with increased relative abundance compared to day 0.

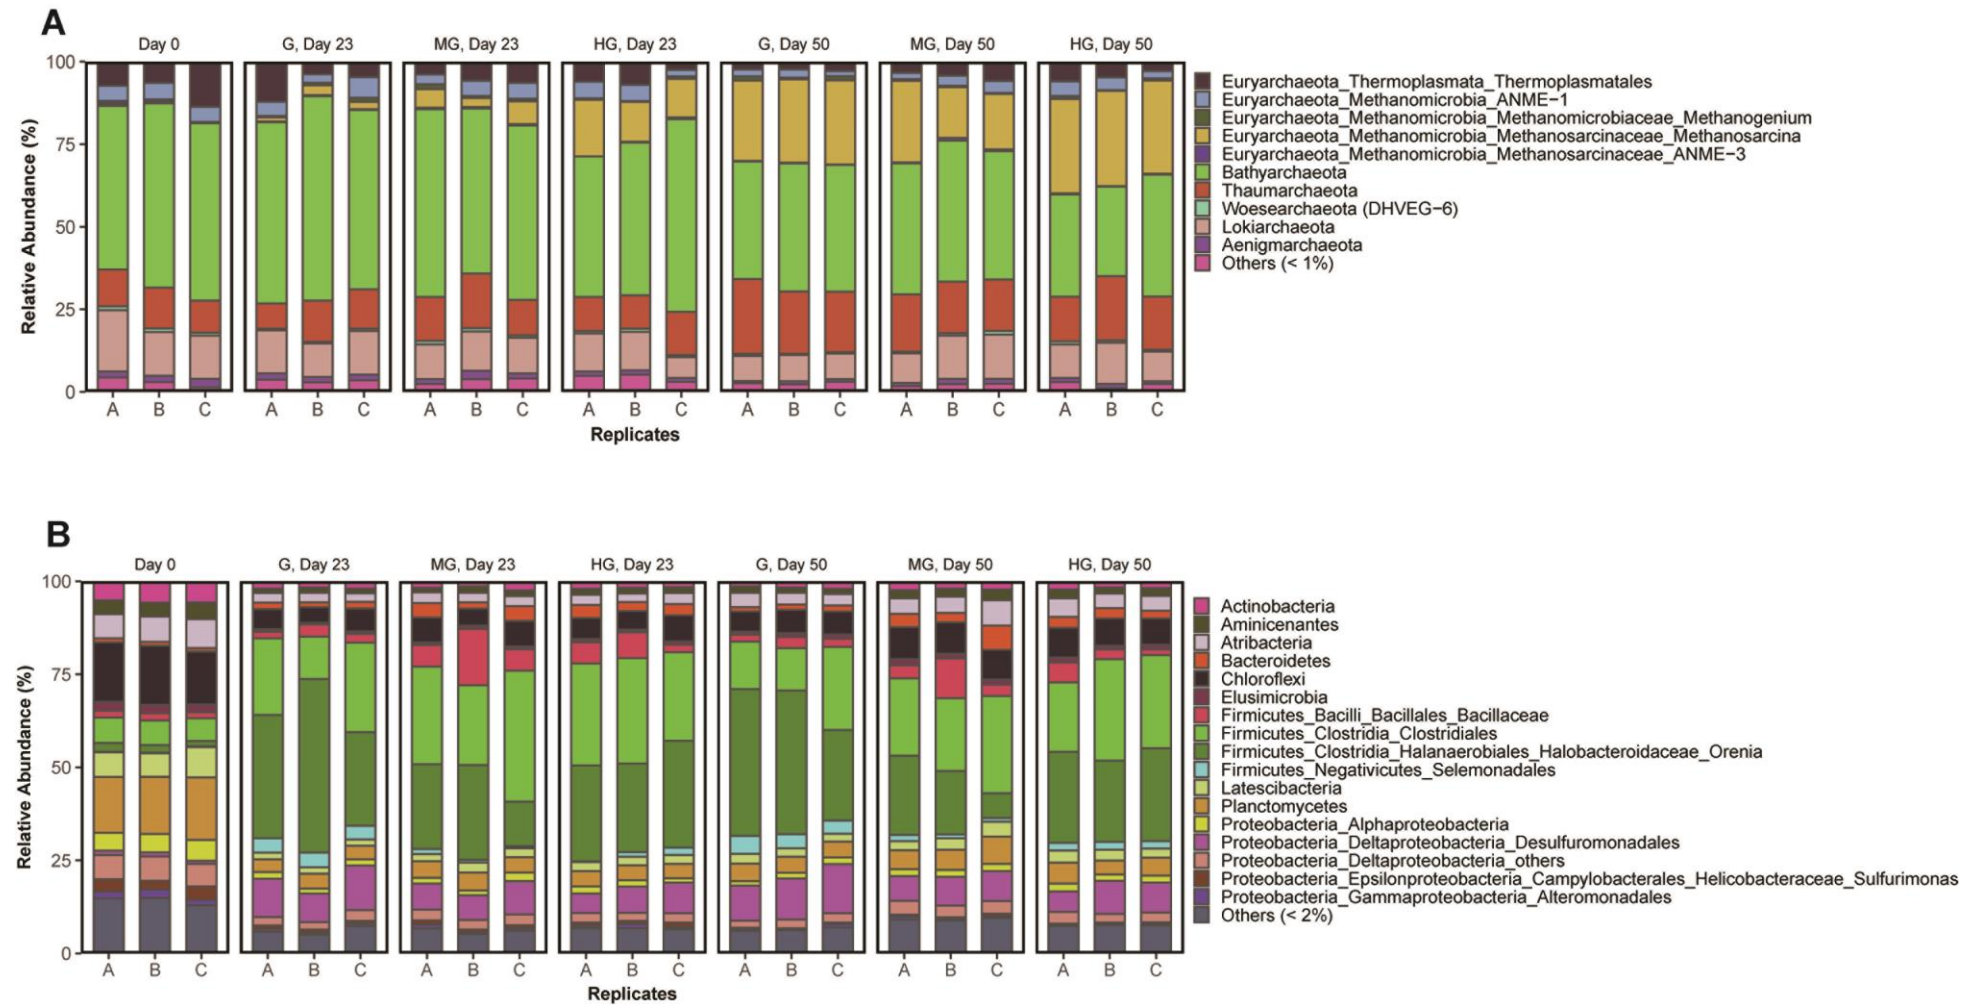

**Figure S5:** Total sum scaling of bacteria (A) and archaea (B) communities in the incubations at 30 °C between day 0 day 23 when Fe<sup>2+</sup> formation reached a plateau and at day 50, when methane concentrations levelled off. G represents glucose amended incubation; MG represents incubations amended with magnetite and glucose while HG represents hematite and glucose amendments. Each triplicate sample was sequenced individually (see methods). Microbial communities were scaled in a mixed style such that the Phyla with decreased relative abundance over time compared to day 0 were reported on the phylum level. Whereas, lower taxonomic classification was reported for orders, families and genera from other phyla with increased relative abundance compared to day 0.

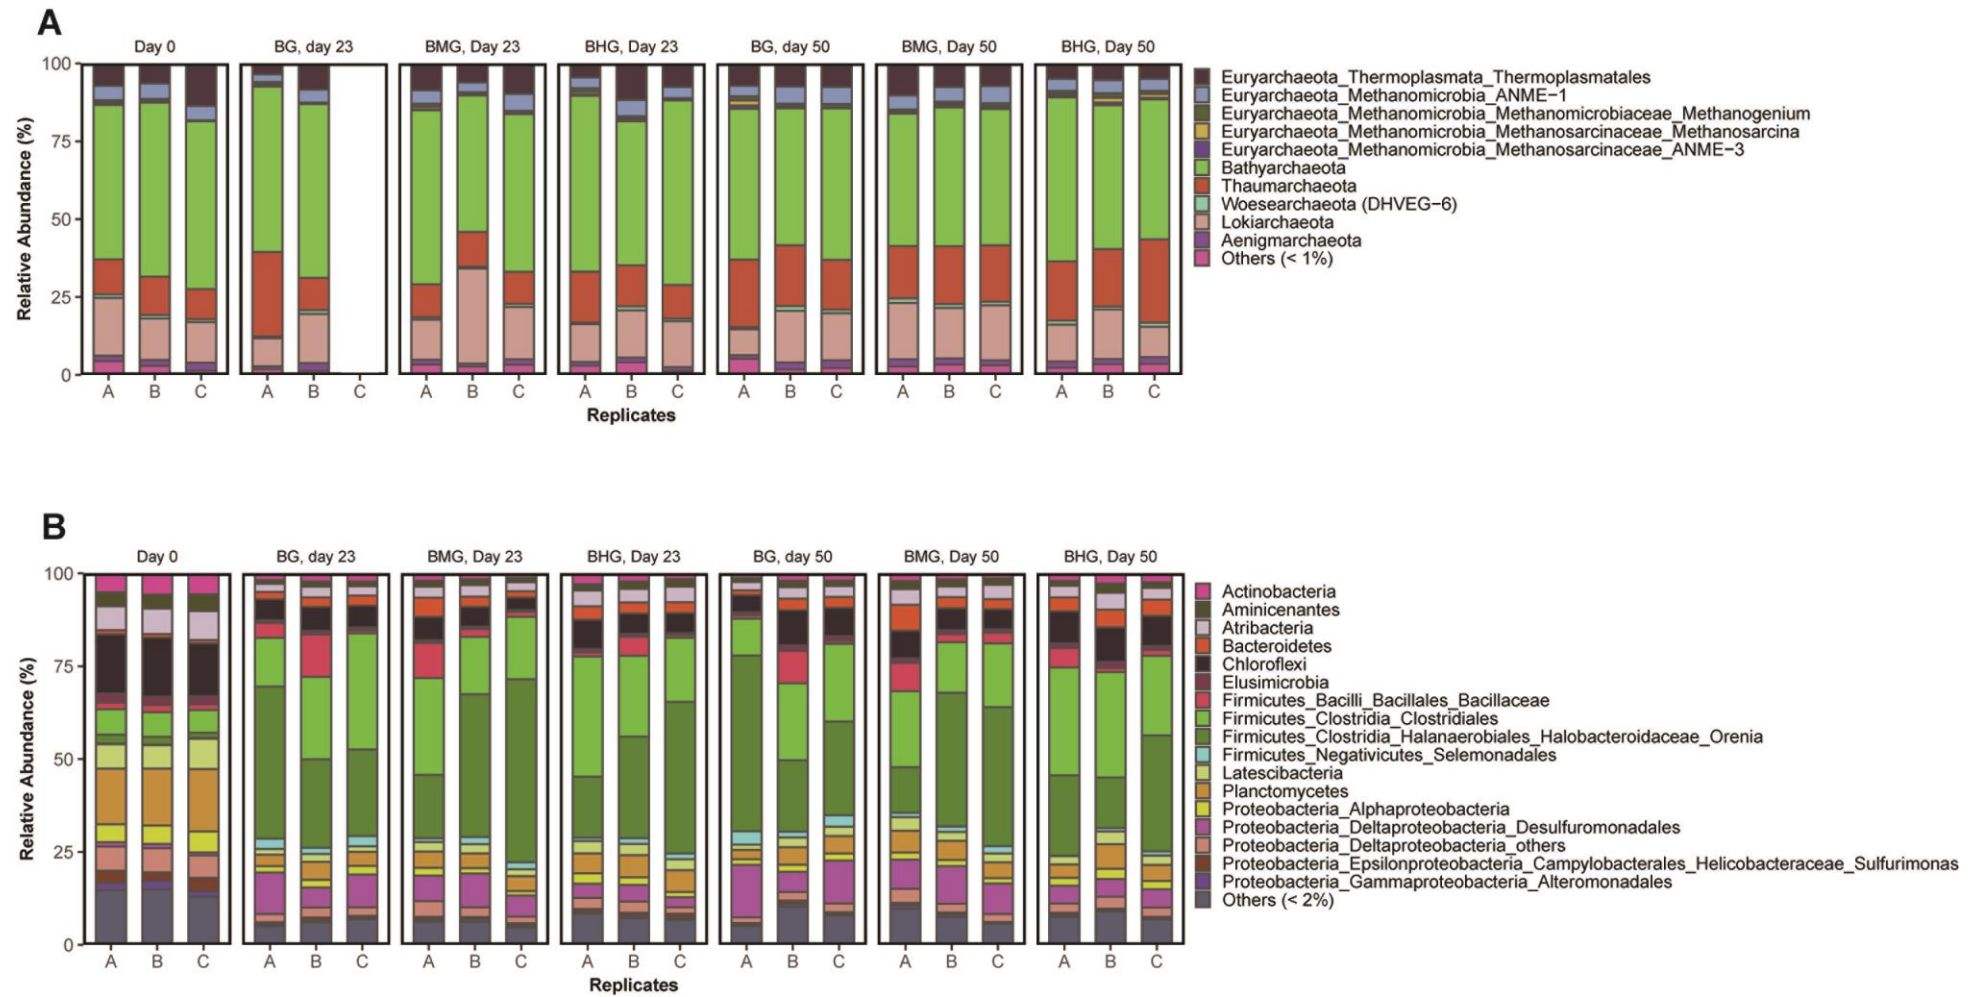

**Figure S6:** Total sum scaling of bacteria (A) and archaea (B) communities in the incubations amended with BES at 30 °C. The archaea sample for BG.c at day 23 failed during the sequencing preparation, hence triplicates for that time point could not be shown.

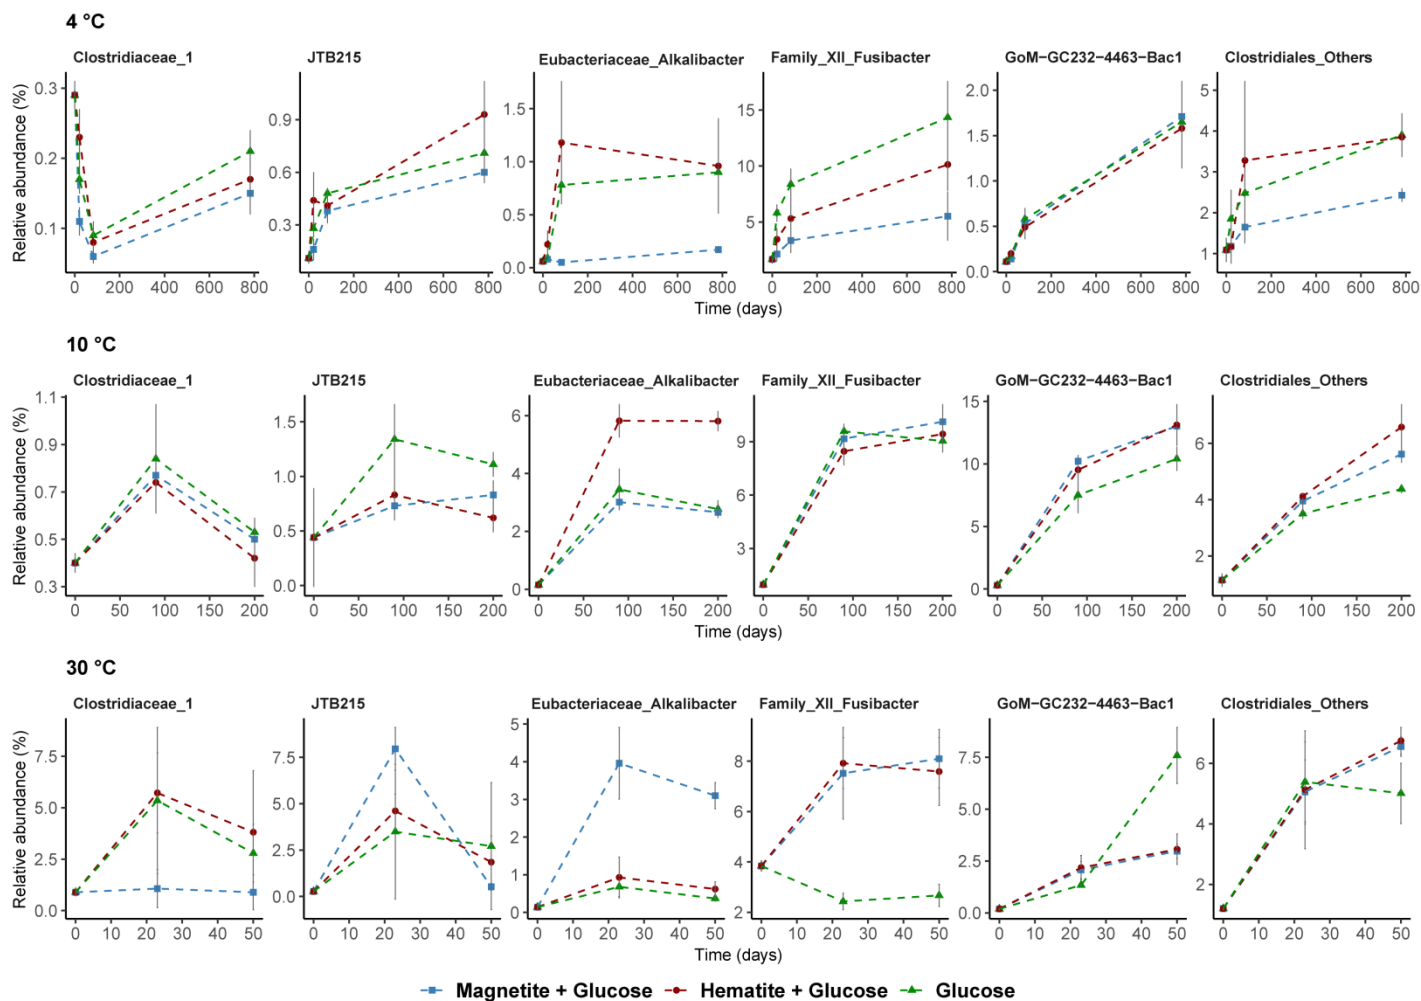

**Figure S7:** Relative abundance of genus or family belonging to the order Clostridiales that were identified at different temperatures demonstrating the versatility of the order Clostridiales at various temperatures.



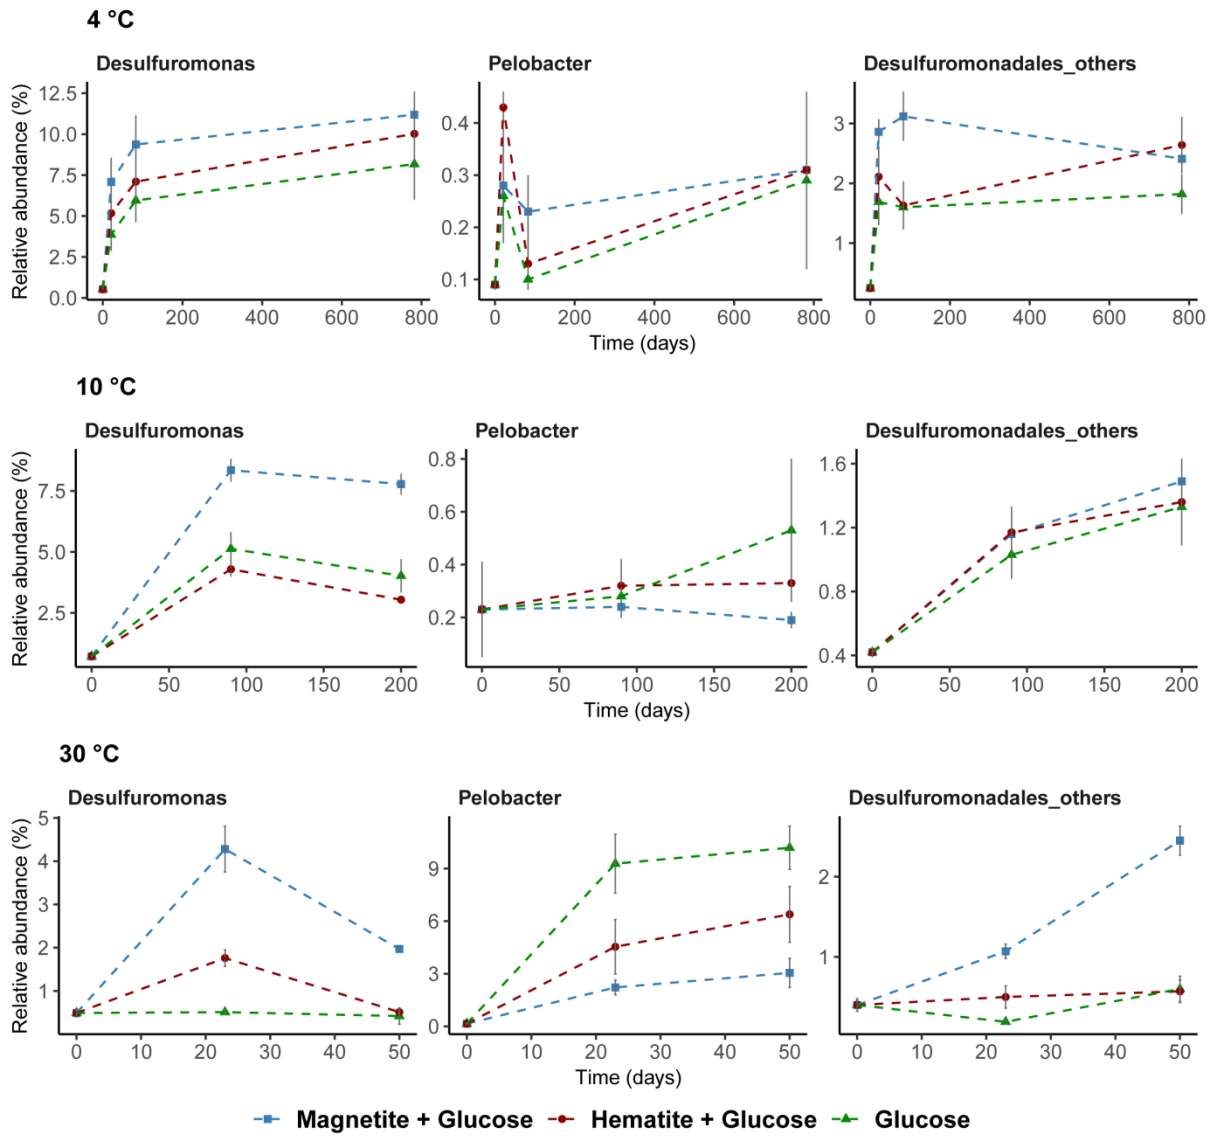

**Figure S8:** Relative abundance of dominant genus from the order Desulfuromonadales. *Desulfuromonas* was higher in relative abundance at 4 °C and 10 °C while *Pelobacter* was more enriched at 30 °C.

**Table S1.** Summary of triplicate incubation experiment set up to study microbial iron reduction and methanogenesis.

| Treatment (n=3)           | Temperature (°C) | Glucose (68 μmoles) | Magnetite (1020 μmoles) | Hematite (1020 μmoles) | Sodium 2-bromoethane sulfonate (BES, 15mM) | Sediment depth used (cm) | Incubation duration (days) |
|---------------------------|------------------|---------------------|-------------------------|------------------------|--------------------------------------------|--------------------------|----------------------------|
| Magnetite + Glucose       | 4                | +                   | +                       | -                      | -                                          | 441–466                  | 900                        |
| Hematite + Glucose        | 4                | +                   | -                       | +                      | -                                          | 441–466                  | 900                        |
| Glucose                   | 4                | +                   | -                       | -                      | -                                          | 441–466                  | 900                        |
| Magnetite + Glucose       | 10               | +                   | +                       | -                      | -                                          | 441–466                  | 216                        |
| Hematite + Glucose        | 10               | +                   | -                       | +                      | -                                          | 441–466                  | 216                        |
| Glucose                   | 10               | +                   | -                       | -                      | -                                          | 441–466                  | 216                        |
| Magnetite + Glucose       | 30               | +                   | +                       | -                      | -                                          | 416–441                  | 80                         |
| Hematite + Glucose        | 30               | +                   | -                       | +                      | -                                          | 416–441                  | 80                         |
| Glucose                   | 30               | +                   | -                       | -                      | -                                          | 416–441                  | 80                         |
| Magnetite + Glucose + BES | 30               | +                   | +                       | -                      | +                                          | 416–441                  | 80                         |
| Hematite + Glucose + BES  | 30               | +                   | -                       | +                      | +                                          | 416–441                  | 80                         |
| Glucose + BES             | 30               | +                   | -                       | -                      | +                                          | 416–441                  | 80                         |

**Table S2.** pH of incubations in duplicate supplementary set-ups to check the effect of glucose fermentation on the slurries.

| Time (days) | Temperature | Magnetite + Glucose_A | Magnetite + Glucose_B | Hematite + Glucose_A | Hematite + Glucose_B | Glucose_A | Glucose_B | Unamended_A | Unamended_B |
|-------------|-------------|-----------------------|-----------------------|----------------------|----------------------|-----------|-----------|-------------|-------------|
| 0           |             | 7.21                  | 7.1                   | 7.15                 | 7.12                 | 7.12      | 7.08      | 7.14        | 7.13        |
| 14          | 4 °C        | 6.89                  | 6.89                  | 6.91                 | 6.83                 | 6.93      | 6.9       | 7.24        | 7.28        |
| 77          |             | 7                     | 7.02                  | 6.9                  | 6.94                 | 6.94      | 6.96      | 7.24        | 7.31        |
| 100         |             | 6.98                  | 7.01                  | 7.02                 | 6.99                 | 6.88      | 6.92      | 7.32        | 7.28        |
| 0           |             | 7.17                  | 7.16                  | 7.21                 | 7.16                 | 7.32      | 7.24      | 7.31        | 7.24        |
| 14          | 10 °C       | 6.92                  | 6.93                  | 6.91                 | 6.82                 | 6.88      | 6.88      | 7.19        | 7.22        |
| 77          |             | 6.98                  | 7.04                  | 7.04                 | 7.03                 | 7.23      | 7.26      | 7.23        | 7.26        |
| 100         |             | 7.01                  | 6.97                  | 7.02                 | 7                    | 6.95      | 6.96      | 7.25        | 7.34        |
| 0           |             | 7.13                  | 7.19                  | 7.15                 | 7.22                 | 7.15      | 7.35      | 7.18        | 7.17        |
| 14          | 30 °C       | 6.89                  | 6.92                  | 7.05                 | 6.9                  | 6.85      | 6.88      | 7.22        | 7.18        |
| 77          |             | 7.05                  | 7.03                  | 7.08                 | 7.05                 | 6.97      | 7.03      | 7.18        | 7.14        |
| 100         |             | 7.02                  | 6.97                  | 6.89                 | 6.86                 | 6.92      | 6.96      | 7.25        | 7.28        |

Data shows carbonate concentrations in the natural carbonate buffer system in the sediment is sufficient to keep the pH of the media stable over time as only slight changes were observed in incubations amended with glucose over time.

**Table S3.** Absolute numbers of sequence reads processed per sample after OTU classification. Archaea 16S rRNA reads in the bacteria sequences and vice versa was removed before arriving at absolute numbers.

| Treatment | 4 °C        |          |         | 10 °C       |          |         | 30 °C       |          |         |
|-----------|-------------|----------|---------|-------------|----------|---------|-------------|----------|---------|
|           | Time (days) | Bacteria | Archaea | Time (days) | Bacteria | Archaea | Time (days) | Bacteria | Archaea |
| day 0.a   |             | 28546    | 4318    |             | 25256    | 4180    |             | 11450    | 6591    |
| day 0.b   | 0           | 19950    | 3646    | 0           | 26023    | 1891    | 0           | 19615    | 5083    |
| day 0.c   |             | 13798    | 7386    |             | 27788    | 8592    |             | 17982    | 3385    |
| G.a       |             | 28500    | 3077    |             | 33363    | 7242    |             | 26693    | 3489    |
| G.b       |             | 17283    | 2392    |             | 32583    | 3222    |             | 17817    | 3348    |
| G.c       |             | 13174    | 2550    |             | 27412    | 6563    |             | 16339    | 3175    |
| MG.a      |             | 13931    | 1421    |             | 15186    | 4709    |             | 10184    | 2566    |
| MG.b      | 21          | 24287    | 3118    | 90          | 21907    | 8333    | 23          | 26935    | 1492    |
| MG.c      |             | 20235    | 4118    |             | 19129    | 4578    |             | 24041    | 3023    |
| HG.a      |             | 19302    | 2809    |             | 17105    | 6143    |             | 23208    | 1789    |
| HG.b      |             | 26092    | 3271    |             | 13894    | 7180    |             | 18273    | 1699    |
| HG.c      |             | 19733    | 2227    |             | 26800    | 1781    |             | 21641    | 2466    |
| G.a       |             | 57136    | 1429    |             | 41484    | 11515   |             | 25290    | 7277    |
| G.b       |             | 61605    | 1336    |             | 53555    | 3319    |             | 52879    | 4740    |
| G.c       |             | 98905    | 2255    |             | 40997    | 7809    |             | 29286    | 5558    |
| MG.a      |             | 34489    | 3432    |             | 18151    | 4048    |             | 13546    | 5527    |
| MG.b      | 83          | 32552    | 1883    | 200         | 34882    | 24628   | 50          | 8267     | 5549    |
| MG.c      |             | 295843   | 2912    |             | 29285    | 7773    |             | 11893    | 6112    |
| HG.a      |             | 50565    | 1243    |             | 20338    | 8554    |             | 13910    | 6807    |
| HG.b      |             | 41664    | 1262    |             | 14696    | 11564   |             | 25312    | 4846    |
| HG.c      |             | 45562    | 1826    |             | 42890    | 3132    |             | 18841    | 6589    |
| G.a       |             | 24800    | 8057    |             |          |         |             |          |         |
| G.b       |             | 19682    | 3141    |             |          |         |             |          |         |
| G.c       |             | 18115    | 8980    |             |          |         |             |          |         |
| MG.a      |             | 13884    | 2791    |             |          |         |             |          |         |
| MG.b      | 782         | 6395     | 4769    |             |          |         |             |          |         |
| MG.c      |             | 11906    | 6057    |             |          |         |             |          |         |
| HG.a      |             | 12216    | 9376    |             |          |         |             |          |         |
| HG.b      |             | 19020    | 9437    |             |          |         |             |          |         |
| HG.c      |             | 18309    | 11681   |             |          |         |             |          |         |

Absolute numbers used to determine relative abundance (%) of individual members of the community (see methods). MG represents incubations amended with magnetite and glucose; HG represents hematite and glucose amendments while G represents glucose amended incubation.

**Table S4.** Absolute numbers of sequence reads processed per sample after OTU classification in the BES incubations at 30 °C. Day 0 treatments for the BES incubations are the same day 0 samples used for the 30 °C incubations without BES (See Table S2).

| Treatment | BES incubations at 30 °C |          |         |
|-----------|--------------------------|----------|---------|
|           | Time (days)              | Bacteria | Archaea |
| BG.a      |                          | 40742    | 3650    |
| BG.b      |                          | 25851    | 1673    |
| BG.c      |                          | 21701    | NA      |
| BMG.a     |                          | 42359    | 3794    |
| BMG.b     | 23                       | 30696    | 2072    |
| BMG.c     |                          | 35359    | 2053    |
| BHG.a     |                          | 21998    | 3427    |
| BHG.b     |                          | 35357    | 5001    |
| BHG.c     |                          | 32684    | 3132    |
|           |                          |          |         |
| BG.a      |                          | 15660    | 1680    |
| BG.b      |                          | 7478     | 1815    |
| BG.c      |                          | 28052    | 3104    |
| BMG.a     |                          | 27804    | 3678    |
| BMG.b     | 50                       | 19719    | 2829    |
| BMG.c     |                          | 37051    | 3354    |
| BHG.a     |                          | 11310    | 5684    |
| BHG.b     |                          | 27417    | 4753    |
| BHG.c     |                          | 24534    | 3016    |

NA represents the BG.c archaea sample at day 23 that failed during sequencing preparation. The unavailability of that sample however had no effect on the overall result as the other two replicates looked similar and the archaea community remained undisturbed over time across all BES amended incubations.
